# Supplementary material for: Bio-based cyclized Eucommia ulmoides gum elastomer for promising damping applications
Source: Royal Society of Chemistry journal article supplement (doi:10.1039/c9ra07856h), 2019-01-01
Supplement: c9ra07856h1.pdf [file c9ra07856h1.pdf]

## Supporting information

### Bio-based cyclized eucommia ulmoides gum elastomer for promising damping applications

Xin Qi,<sup>a</sup> Fei Xie,<sup>a</sup> Jichuan Zhang,<sup>a,b</sup> Liqun Zhang,<sup>a,b</sup> Dongmei Yue\*<sup>a,b</sup>

<sup>a</sup> State Key Laboratory of Organic-Inorganic Composites, Beijing University of Chemical Technology, Beijing 100029, PR China.

<sup>b</sup> Key Laboratory of Beijing City on Preparation and Processing of Novel Polymer Materials, Beijing 100029, PR China.

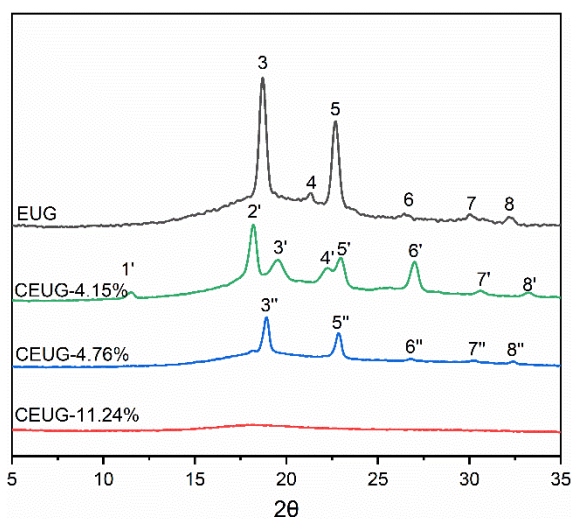

Fig. S1 XRD spectra of EUG and CEUG with various degree of cyclization
